# Supplementary material
Source: publisher figshare collection journal article supplement (https://acs.figshare.com/ndownloader/files/5183671)
Supplement: Supplementary file 1 [file 5183671]

## Supporting Information

### General Procedure for the Preparation of Thioacids 4, 7, 10 and 12.

To a stirred solution of the appropriate peptide (0.6 mmol) and *N*-hydroxysuccinimide (0.6 mmol) in dry CH<sub>2</sub>Cl<sub>2</sub> (7 mL) was added DCC (0.6 mmol) at 0 °C under N<sub>2</sub>. Then the mixture was stirred at 0 °C for 30 min, warmed to room temperature and stirred overnight. The resulting precipitate was removed by filtration and washed several times with CH<sub>2</sub>Cl<sub>2</sub>. The combined filtrate was concentrated to about one-fifth of its original volume and left to stand in the refrigerator for about 2 h. The mixture was filtered again and concentrated to give the corresponding activated ester as a colourless foam, which was immediately dissolved in dry THF (12 mL) followed by addition of DIPEA (0.6 mmol). This mixture was cooled to 0 °C and bubbled with H<sub>2</sub>S gas for 1 h, then stirred at room temperature overnight. The solvent was removed in vacuo, and EtOAc-H<sub>2</sub>O was added. The pH was adjusted to a value of ~3 by careful addition of 1 N HCl, upon which the organic layer was collected, washed several times with water, dried over MgSO<sub>4</sub> and concentrated in vacuo. The resulting thioacid was dried under vacuum and directly used in the next step without purification.

### A Typical Procedure for the Synthesis of Thioglycosides 3, 5, 8, 11 and 13.

To a stirred solution of azide **1** (126 mg, 0.3 mmol) in CHCl<sub>3</sub> (0.5 mL) was added 2,6-lutidine (48 mg, 0.45 mmol) followed by addition of thioacid **2** (82 mg, 0.4 mmol). The mixture was refluxed overnight under N<sub>2</sub>, then concentrated in vacuo to give a residue which was purified by flash column chromatography (petroleum ether/EtOAc, 1:1) to afford the recovered azide **1** (43 mg) and the desired thioglycoside **3** (88 mg, 79% based on recovered starting material): TLC *R<sub>f</sub>* = 0.11 (petroleum ether/EtOAc, 1:1); [ $\alpha$ ]<sub>D</sub> = -17.5° (c 1.2 CHCl<sub>3</sub>); <sup>1</sup>H NMR (CDCl<sub>3</sub>)  $\delta$  6.82 (t, *J* = 6.0 Hz, 1H), 5.20 (t, *J* = 9.2 Hz, 1H), 5.13 (d, *J* = 8.7 Hz, 1H), 5.07 (t, *J* = 9.4 Hz, 1H), 5.02 (t, *J* = 9.3 Hz, 1H), 4.70 (dd, *J* = 14.3, 6.8 Hz, 1H), 4.64 (d, *J* = 9.9 Hz, 1H), 4.27 (overlapped dd, *J* = 14.3, 5.6 Hz, 1H), 4.25 (d, *J* = 4.1 Hz, 2H), 4.15 (m, 1H), 3.72 (dt, *J* = 9.8, 3.3 Hz, 1H), 2.08, 2.01, 2.00, 1.98 (4s, 12H), 1.42 (s, 9H), 1.33 (d, *J* = 7.1 Hz, 3H); <sup>13</sup>C NMR (CDCl<sub>3</sub>)  $\delta$  172.7, 170.8, 170.0, 169.5, 169.3, 155.4, 82.6, 80.1, 73.7, 69.9, 68.1, 61.6, 39.1, 28.3, 20.8, 20.6, 20.5, 18.3; MALDI-MS *m/z* 586.8 [M + Na<sup>+</sup>], 602.9 [M + K<sup>+</sup>]. HRMS (MALDI) calcd for C<sub>23</sub>H<sub>36</sub>N<sub>2</sub>O<sub>12</sub>SNa (M + Na<sup>+</sup>) 587.1888, found 587.1903.

**5:** The reaction procedure was identical with that for **3** except thioacid **4** was used instead of **2**. Product **5** (43 mg) was obtained from **1** (48 mg, 0.11 mmol) and **4** (40 mg, 0.15 mmol) after purification by flash column chromatography (petroleum ether/EtOAc, 1:2 → EtOAc) in 83% yield based on recovered azide **1** (13 mg): TLC  $R_f$  = 0.26 (EtOAc);  $[\alpha]_D = -16.1^\circ$  (c 1.0 CHCl<sub>3</sub>); <sup>1</sup>H NMR (CDCl<sub>3</sub>)  $\delta$  7.46 (br s, 1H), 7.20 (t,  $J$  = 5.8 Hz, 1H), 5.25 (d,  $J$  = 5.9 Hz, 1H), 5.19 (t,  $J$  = 9.2 Hz, 1H), 5.06 (t,  $J$  = 9.7 Hz, 1H), 5.00 (t,  $J$  = 9.2 Hz, 1H), 4.69 (d,  $J$  = 10.0 Hz, 1H), 4.46 (m, 2H), 4.21 (m, 2H), 4.13 (m, 1H), 4.07 (t,  $J$  = 6.8 Hz, 1H), 3.80 (dd,  $J$  = 17.1, 4.9 Hz, 1H), 3.70 (dt,  $J$  = 9.9, 3.2 Hz, 1H), 2.07, 2.00, 1.99, 1.95 (4s, 12H), 1.40 (s, 9H), 1.34 (d,  $J$  = 7.0 Hz, 3H); <sup>13</sup>C NMR (CDCl<sub>3</sub>)  $\delta$  173.5, 171.1, 170.0, 169.6, 169.4, 169.2, 155.9, 82.9, 80.5, 76.2, 73.8, 69.8, 68.2, 61.7, 50.8, 43.0, 39.4, 28.3, 20.8, 20.6, 20.5, 17.7; MALDI-MS  $m/z$  644.1 [M + Na<sup>+</sup>], 660.0 [M + K<sup>+</sup>]. HRMS (MALDI) calcd for C<sub>25</sub>H<sub>39</sub>N<sub>3</sub>O<sub>13</sub>SNa (M + Na<sup>+</sup>) 644.2102, found 644.2096.

**8:** The reaction procedure was identical with that for **3** except azide **6** was used in place of **1** and thioacid **7** was used instead of **2**. Product **8** (49 mg) was obtained from **6** (58 mg, 0.14 mmol) and **7** (70 mg, 0.18 mmol) after purification by flash column chromatography (petroleum ether/EtOAc, 1:1 → 1:2) in 76% yield based on recovered azide **6** (21 mg): TLC  $R_f$  = 0.15 (petroleum ether/EtOAc, 2:3);  $[\alpha]_D = +1.8^\circ$  (c 1.0 CHCl<sub>3</sub>); <sup>1</sup>H NMR (CDCl<sub>3</sub>)  $\delta$  7.42 (d,  $J$  = 7.6 Hz, 1H), 6.65 (t,  $J$  = 5.6 Hz, 1H), 6.19 (d,  $J$  = 7.2 Hz, 1H), 5.42 (dd,  $J$  = 3.2, 0.8 Hz, 1H), 5.23 (t,  $J$  = 9.9 Hz, 1H), 5.04 (dd,  $J$  = 10.0, 3.3 Hz, 1H), 4.62 (d,  $J$  = 9.9 Hz, 1H), 4.58 (dd,  $J$  = 14.2, 6.2 Hz, 1H), 4.47 (dd,  $J$  = 8.5, 4.8 Hz, 2H), 4.40 (dd,  $J$  = 14.3, 6.0 Hz, 1H), 4.25 (dd,  $J$  = 11.4, 7.0 Hz, 1H), 4.05 (dd,  $J$  = 11.4, 5.5 Hz, 1H), 3.94 (t,  $J$  = 6.7 Hz, 1H), 3.69 (s, 3H), 2.82 (dd,  $J$  = 15.7, 4.1 Hz, 1H), 2.58 (dd,  $J$  = 15.6, 6.3 Hz, 1H), 2.16, 2.05, 2.04, 1.96 (4s, 12H), 1.92 (m, 1H), 1.43 (s, 9H), 1.42 (overlapped m, 1H), 1.21 (m, 1H), 0.89 (d,  $J$  = 6.8 Hz, 3H), 0.88 (d,  $J$  = 7.3 Hz, 3H); <sup>13</sup>C NMR (CDCl<sub>3</sub>)  $\delta$  171.9, 171.12, 171.07, 170.5, 170.2, 169.9, 155.7, 82.7, 80.3, 75.2, 71.7, 67.5, 67.1, 61.6, 56.8, 52.0, 50.9, 38.7, 37.5, 28.3, 24.9, 20.75, 20.72, 20.6, 20.5, 15.5, 11.5; MALDI-MS  $m/z$  758.1 [M + Na<sup>+</sup>], 774.1 [M + K<sup>+</sup>]. HRMS (MALDI) calcd for C<sub>31</sub>H<sub>49</sub>N<sub>3</sub>O<sub>15</sub>SNa (M + Na<sup>+</sup>) 758.2783, found 758.2811.

**11:** The reaction procedure was identical with that for **3** except azide **9** was used in place of **1** and thioacid **10** was used instead of **2**. Product **11** (48 mg) was obtained from **9** (77 mg, 0.11 mmol) and **10** (67 mg, 0.15 mmol) after purification by flash column chromatography (toluene/acetone, 3:1 → 1:1) in 65% yield based on recovered azide **9** (29 mg): TLC  $R_f$  = 0.07 (petroleum ether/EtOAc, 1:2);  $[\alpha]_D = -5.4^\circ$  (c 0.7 CHCl<sub>3</sub>); <sup>1</sup>H NMR (CDCl<sub>3</sub>)  $\delta$  7.31 (m, 10H),

7.18 (d,  $J = 7.1$  Hz, 1H), 6.76 (t-like, 1H), 6.20 (d,  $J = 7.0$  Hz, 1H), 5.20-5.01 (m, 8H), 4.95 (t,  $J = 4.9$  Hz, 1H), 4.90 (dd,  $J = 9.6, 2.7$  Hz, 1H), 4.73 (dd,  $J = 12.4, 1.5$  Hz, 1H), 4.63 (dd,  $J = 14.6, 7.1$  Hz, 1H), 4.56 (m, 4H), 4.37 (dd,  $J = 12.5, 4.0$  Hz, 1H), 4.22 (m, 2H), 4.07 (dd,  $J = 12.2, 4.1$  Hz, 1H), 4.01 (dd,  $J = 12.5, 1.8$  Hz, 1H), 3.76 (t,  $J = 9.6$  Hz, 1H), 3.62 (m, 2H), 2.40 (m, 2H), 2.10, 2.06, 2.00, 1.99, 1.96 (5s, 21H), 1.38 (d,  $J = 6.9$  Hz, 3H);  $^{13}\text{C}$  NMR ( $\text{CDCl}_3$ )  $\delta$  172.8, 172.4, 170.9, 170.4, 170.2, 169.8, 169.6, 169.2, 168.9, 156.4, 136.3, 135.4, 128.6, 128.5, 128.4, 128.12, 128.09, 127.96, 100.7, 82.9, 75.9, 73.2, 72.9, 72.0, 71.6, 70.3, 67.7, 67.1, 67.0, 61.5, 61.2, 54.3, 48.2, 39.5, 32.3, 28.7, 21.0, 20.6, 20.5, 17.9; MALDI-MS  $m/z$  1128.9 [ $\text{M} + \text{Na}^+$ ], 1144.9 [ $\text{M} + \text{K}^+$ ]. HRMS (MALDI) calcd for  $\text{C}_{50}\text{H}_{63}\text{N}_3\text{O}_{23}\text{SNa}$  ( $\text{M} + \text{Na}^+$ ) 1128.3472, found 1128.3448. Anal. Calcd for  $\text{C}_{50}\text{H}_{63}\text{N}_3\text{O}_{23}\text{S}$  (1106.11): C, 54.29; H, 5.74; N, 3.80. Found: C, 54.77; H, 5.88; N, 4.15.

**13:** The reaction procedure was identical with that for **3** except azide **6** was used in place of **1** and thioacid **12** was used instead of **2**. Product **13** (41 mg) was obtained from **6** (53 mg, 0.13 mmol) and **12** (87 mg, 0.17 mmol) after purification by flash column chromatography (petroleum ether/EtOAc, 1:1  $\rightarrow$  1:3) in 72% yield based on recovered azide **6** (25 mg): TLC  $R_f = 0.42$  (EtOAc);  $[\alpha]_D = -40.3^\circ$  (c 0.7  $\text{CHCl}_3$ );  $^1\text{H}$  NMR ( $\text{CDCl}_3$ )  $\delta$  7.26 (d,  $J = 9.4$  Hz, 1H), 6.62 (t,  $J = 5.8$  Hz, 1H), 6.10 (d,  $J = 8.8$  Hz, 1H), 5.42 (d,  $J = 3.2$  Hz, 1H), 5.22 (t,  $J = 9.9$  Hz, 1H), 5.05 (dd,  $J = 10.1, 3.4$  Hz, 1H), 4.63 (d,  $J = 9.9$  Hz, 1H), 4.54 (q-like, 2H), 4.46-4.32 (m, 3H), 4.24 (dd,  $J = 11.6, 7.0$  Hz, 1H), 4.06 (dd,  $J = 11.5, 5.5$  Hz, 1H), 3.94 (t,  $J = 6.5$  Hz, 1H), 3.72 (m, 1H), 3.64 (m, 1H), 2.84 (dd,  $J = 15.6, 4.3$  Hz, 1H), 2.57 (dd,  $J = 15.6, 5.4$  Hz, 1H), 2.16, 2.05, 2.04, 1.96 (4s, 12H), 2.15-1.90 (overlapped m, 5H), 1.42 (s, 18H), 1.00 (d,  $J = 6.7$  Hz, 3H), 0.93 (d,  $J = 6.6$  Hz, 3H);  $^{13}\text{C}$  NMR ( $\text{CDCl}_3$ )  $\delta$  171.2, 170.9, 170.5, 170.2, 170.0, 169.9, 155.8, 82.8, 81.3, 80.4, 75.2, 71.7, 67.5, 67.2, 61.6, 59.8, 55.8, 51.4, 47.2, 38.8, 37.4, 31.2, 29.1, 28.3, 27.9, 24.9, 20.79, 20.75, 20.67, 20.5, 19.4, 17.6; MALDI-MS  $m/z$  883.8 [ $\text{M} + \text{Na}^+$ ], 899.7 [ $\text{M} + \text{K}^+$ ]. HRMS (MALDI) calcd for  $\text{C}_{38}\text{H}_{60}\text{N}_4\text{O}_{16}\text{SNa}$  ( $\text{M} + \text{Na}^+$ ) 883.3625, found 883.3640. Anal. Calcd for  $\text{C}_{38}\text{H}_{60}\text{N}_4\text{O}_{16}\text{S}$  (860.97): C, 53.01; H, 7.02; N, 6.51. Found: C, 53.44; H, 7.06; N, 6.30.

### General Procedure for the Preparation of GTM-Br 14 – 22.

To a stirred solution of the appropriate glycosylthiol (0.8 mmol) in  $\text{CH}_2\text{Br}_2$  (12 mL) was added  $\text{K}_2\text{CO}_3$  (1.6 mmol). The resulting mixture was stirred at room temperature until the disappearance of the starting material, as determined by TLC (typically 5 h). At this time, the

solid was removed by filtration and the filtrate was concentrated. The residue was purified by flash column chromatography to give the corresponding glycosylthiomethyl bromide.

**14:** TLC  $R_f$  = 0.38 (petroleum ether/EtOAc, 1.3:1);  $[\alpha]_D = -118.0^\circ$  (c 1.1 CHCl<sub>3</sub>); <sup>1</sup>H NMR (CDCl<sub>3</sub>)  $\delta$  5.25 (t,  $J$  = 9.2 Hz, 1H), 5.07 (t,  $J$  = 9.9 Hz, 1H), 5.05 (t,  $J$  = 9.2 Hz, 1H), 4.77 (d,  $J$  = 10.2 Hz, 1H), 4.73, 4.52 (AB peak,  $J$  = 11.0 Hz, 2H), 4.23 (dd,  $J$  = 12.5, 4.9 Hz, 1H), 4.12 (dd,  $J$  = 12.5, 2.4 Hz, 1H), 3.75 (ddd,  $J$  = 10.0, 4.9, 2.4 Hz, 1H), 2.04, 2.01, 1.99, 1.97 (4s, 12H); <sup>13</sup>C NMR (CDCl<sub>3</sub>)  $\delta$  170.5, 170.0, 169.3, 81.8, 76.2, 73.6, 69.7, 68.1, 61.8, 31.9, 20.6, 20.5; MALDI-MS  $m/z$  479.5 [M + Na<sup>+</sup>], 495.5 [M + K<sup>+</sup>]. Anal. Calcd for C<sub>15</sub>H<sub>21</sub>BrO<sub>9</sub>S (457.29): C, 39.40; H, 4.63. Found: C, 39.25; H, 4.61.

**15:** TLC  $R_f$  = 0.49 (petroleum ether/EtOAc, 2:1);  $[\alpha]_D = -27.2^\circ$  (c 1.1 CHCl<sub>3</sub>); <sup>1</sup>H NMR (CDCl<sub>3</sub>)  $\delta$  8.09-7.80 (m, 8H), 7.60-7.26 (m, 12H), 6.03 (t,  $J$  = 9.5 Hz, 1H), 5.73 (t,  $J$  = 9.8 Hz, 1H), 5.65 (t,  $J$  = 9.5 Hz, 1H), 5.22 (d,  $J$  = 10.1 Hz, 1H), 4.85, 4.55 (AB peak,  $J$  = 10.9 Hz, 2H), 4.66 (dd,  $J$  = 12.3, 2.9 Hz, 1H), 4.53 (dd,  $J$  = 12.3, 5.7 Hz, 1H), 4.28 (ddd,  $J$  = 9.8, 5.6, 2.8 Hz, 1H); <sup>13</sup>C NMR (CDCl<sub>3</sub>)  $\delta$  165.8, 165.5, 165.0, 164.9, 133.3, 133.1, 133.0, 129.7, 129.6, 129.51, 129.45, 129.3, 128.5, 128.4, 128.2, 128.1, 81.9, 76.4, 73.8, 70.4, 69.3, 62.9, 32.0; MALDI-MS  $m/z$  727.0 [M + Na<sup>+</sup>], 743.0 [M + K<sup>+</sup>]. Anal. Calcd for C<sub>35</sub>H<sub>29</sub>BrO<sub>9</sub>S (705.58): C, 59.58; H, 4.14. Found: C, 59.55; H, 4.36.

**16:** TLC  $R_f$  = 0.26 (petroleum ether/EtOAc, 1:1);  $[\alpha]_D = -70.1^\circ$  (c 1.0 CHCl<sub>3</sub>); <sup>1</sup>H NMR (CDCl<sub>3</sub>)  $\delta$  5.33 (d,  $J$  = 3.1 Hz, 1H), 5.25 (t,  $J$  = 9.1 Hz, 1H), 5.10 (dd,  $J$  = 10.4, 7.9 Hz, 1H), 5.00 (t,  $J$  = 9.7 Hz, 1H), 4.93 (dd,  $J$  = 10.4, 3.4 Hz, 1H), 4.76, 4.52 (AB peak,  $J$  = 10.0 Hz, 2H), 4.72 (d,  $J$  = 10.9 Hz, 1H), 4.49 (m, 2H), 4.08 (m, 3H), 3.86 (t,  $J$  = 6.9 Hz, 1H), 3.81 (t,  $J$  = 9.2 Hz, 1H), 3.68 (ddd,  $J$  = 9.8, 5.0, 1.7 Hz, 1H), 2.13, 2.10, 2.04, 2.03, 1.94 (5s, 21H); <sup>13</sup>C NMR (CDCl<sub>3</sub>)  $\delta$  169.9, 169.8, 169.6, 169.3, 168.7, 100.5, 81.1, 76.7, 75.6, 73.2, 70.6, 70.4, 69.8, 68.8, 66.4, 61.6, 60.7, 31.8, 20.5, 20.4, 20.3, 20.1; MALDI-MS  $m/z$  768.5 [M + Na<sup>+</sup>]. Anal. Calcd for C<sub>27</sub>H<sub>37</sub>BrO<sub>17</sub>S·H<sub>2</sub>O (763.55): C, 42.47; H, 5.15. Found: C, 42.44; H, 5.00.

**17:** TLC  $R_f$  = 0.28 (petroleum ether/EtOAc, 1:1);  $[\alpha]_D = -97.2^\circ$  (c 1.0 CHCl<sub>3</sub>); <sup>1</sup>H NMR (CDCl<sub>3</sub>)  $\delta$  5.22 (t,  $J$  = 9.1 Hz, 1H), 5.11 (t,  $J$  = 9.3 Hz, 1H), 5.02 (t,  $J$  = 9.3 Hz, 1H), 4.99 (t,  $J$  = 9.2 Hz, 1H), 4.89 (t,  $J$  = 9.0 Hz, 1H), 4.53 (dd,  $J$  = 12.1, 1.9 Hz, 1H), 4.74 (d,  $J$  = 10.1 Hz, 1H), 4.70, 4.50 (AB peak,  $J$  = 10.9 Hz, 2H), 4.49 (d,  $J$  = 7.9 Hz, 1H), 4.33 (dd,  $J$  = 12.5, 4.5 Hz, 1H), 4.08 (dd,  $J$  = 12.1, 5.2 Hz, 1H), 4.01 (dd,  $J$  = 12.4, 2.2 Hz, 1H), 3.77 (t,  $J$  = 9.5 Hz,

1H), 3.65 (m, 2H), 2.09, 2.05, 2.01, 2.00, 1.99, 1.97, 1.94 (7s, 21H);  $^{13}\text{C}$  NMR ( $\text{CDCl}_3$ )  $\delta$  170.0, 169.8, 169.7, 169.2, 169.1, 168.9, 168.6, 100.3, 81.2, 76.7, 75.9, 72.9, 72.5, 71.5, 71.2, 69.7, 67.5, 61.5, 61.3, 31.8, 20.4, 20.2, 20.1; MALDI-MS  $m/z$  768.4  $[\text{M} + \text{Na}^+]$ , 784.4  $[\text{M} + \text{K}^+]$ . Anal. Calcd for  $\text{C}_{27}\text{H}_{37}\text{BrO}_{17}\text{S}$  (745.54): C, 43.50; H, 5.00. Found: C, 43.38; H, 5.07.

**18:** TLC  $R_f$  = 0.26 (petroleum ether/EtOAc, 2.3:1);  $[\alpha]_D = -152.6^\circ$  (c 1.0  $\text{CHCl}_3$ );  $^1\text{H}$  NMR ( $\text{CDCl}_3$ )  $\delta$  5.18 (t,  $J$  = 7.5 Hz, 1H), 4.97 (t,  $J$  = 7.8 Hz, 1H), 4.92 (m, 2H), 4.72, 4.53 (AB peak,  $J$  = 11.0 Hz, 2H), 4.24 (dd,  $J$  = 11.9, 4.7 Hz, 1H), 3.48 (dd,  $J$  = 11.9, 8.1 Hz, 1H), 2.06, 2.05, 2.03 (3s, 9H);  $^{13}\text{C}$  NMR ( $\text{CDCl}_3$ )  $\delta$  169.3, 169.2, 168.9, 81.8, 70.7, 69.0, 67.9, 64.5, 32.4, 20.4, 20.3. Anal. Calcd for  $\text{C}_{12}\text{H}_{17}\text{BrO}_7\text{S}$  (385.23): C, 37.41; H, 4.45. Found: C, 37.60; H, 4.16.

**19:** TLC  $R_f$  = 0.27 (petroleum ether/EtOAc, 2.3:1);  $[\alpha]_D = -127.6^\circ$  (c 1.0  $\text{CHCl}_3$ );  $^1\text{H}$  NMR ( $\text{CDCl}_3$ )  $\delta$  5.30 (m, 1H), 5.21 (dd,  $J$  = 8.1, 7.3 Hz, 1H), 5.13 (dd,  $J$  = 8.0, 3.3 Hz, 1H), 4.89 (d,  $J$  = 7.3 Hz, 1H), 4.74, 4.54 (AB peak,  $J$  = 11.0 Hz, 2H), 4.10 (dd,  $J$  = 12.6, 4.5 Hz, 1H), 3.71 (dd,  $J$  = 12.7, 2.3 Hz, 1H), 2.10, 2.07, 2.03 (3s, 9H);  $^{13}\text{C}$  NMR ( $\text{CDCl}_3$ )  $\delta$  169.8, 169.5, 169.2, 82.1, 69.7, 68.1, 67.1, 65.0, 32.8, 20.6, 20.5, 20.4; MALDI-MS  $m/z$  406.8  $[\text{M} + \text{Na}^+]$ . Anal. Calcd for  $\text{C}_{12}\text{H}_{17}\text{BrO}_7\text{S}$  (385.23): C, 37.41; H, 4.45. Found: C, 37.20; H, 4.80.

**20:** TLC  $R_f$  = 0.52 (EtOAc);  $[\alpha]_D = -185.5^\circ$  (c 0.8  $\text{CHCl}_3$ );  $^1\text{H}$  NMR ( $\text{CDCl}_3$ )  $\delta$  5.74 (d,  $J$  = 9.4 Hz, 1H), 5.19 (t,  $J$  = 9.4 Hz, 1H), 5.10 (t,  $J$  = 9.4 Hz, 1H), 4.81 (d,  $J$  = 10.5 Hz, 1H), 4.79, 4.56 (AB peak,  $J$  = 10.9 Hz, 2H), 4.20 (m, 3H), 3.75 (ddd,  $J$  = 9.5, 4.9, 2.5 Hz, 1H), 2.07, 2.02, 1.94 (3s, 12H);  $^{13}\text{C}$  NMR ( $\text{CDCl}_3$ )  $\delta$  171.1, 170.6, 170.2, 169.2, 82.8, 76.2, 73.6, 68.3, 62.0, 52.7, 33.0, 23.1, 20.7, 20.6, 20.5; MALDI-MS  $m/z$  478.0  $[\text{M} + \text{Na}^+]$ , 494.0  $[\text{M} + \text{K}^+]$ .

**21:** TLC  $R_f$  = 0.28 (petroleum ether/EtOAc, 2:1);  $[\alpha]_D = -81.9^\circ$  (c 1.0  $\text{CHCl}_3$ );  $^1\text{H}$  NMR ( $\text{CDCl}_3$ )  $\delta$  5.54 (d,  $J$  = 9.1 Hz, 1H), 5.28 (t,  $J$  = 10.0 Hz, 1H), 5.08 (t,  $J$  = 9.7 Hz, 1H), 4.88 (d,  $J$  = 10.5 Hz, 1H), 4.77, 4.57 (AB peak,  $J$  = 11.0 Hz, 2H), 4.76, 4.64 (AB peak,  $J$  = 12.1 Hz, 2H), 4.25 (dd,  $J$  = 12.5, 5.0 Hz, 1H), 4.15 (dd,  $J$  = 12.4, 2.2 Hz, 1H), 3.91 (q,  $J$  = 10.0 Hz, 1H), 3.79 (ddd,  $J$  = 9.9, 5.0, 2.3 Hz, 1H), 2.06, 2.01, 2.00 (3s, 9H);  $^{13}\text{C}$  NMR ( $\text{CDCl}_3$ )  $\delta$  170.7, 170.6, 169.3, 154.1, 95.2, 82.5, 76.1, 74.5, 73.1, 68.5, 62.0, 54.7, 32.4, 20.7, 20.5; MALDI-MS  $m/z$  609.6  $[\text{M} + \text{Na}^+]$ , 625.7  $[\text{M} + \text{K}^+]$ . Anal. Calcd for  $\text{C}_{16}\text{H}_{21}\text{BrCl}_3\text{NO}_9\text{S}$  (589.67): C, 32.59; H, 3.59; N, 2.38. Found: C, 32.63; H, 3.83; N, 2.18.

**22:** TLC  $R_f$  = 0.14 (petroleum ether/EtOAc, 2:1);  $[\alpha]_D = -23.0^\circ$  (c 1.0 CHCl<sub>3</sub>); <sup>1</sup>H NMR (CDCl<sub>3</sub>)  $\delta$  7.84 (br s, 2H), 7.72 (m, 2H), 5.87 (dd,  $J$  = 10.1, 9.2 Hz, 1H), 5.74 (d,  $J$  = 10.7 Hz, 1H), 5.19 (dd,  $J$  = 10.1, 9.3 Hz, 1H), 4.71, 4.48 (AB peak,  $J$  = 11.0 Hz, 2H), 4.44 (t,  $J$  = 10.6 Hz, 1H), 4.33 (dd,  $J$  = 12.5, 4.8 Hz, 1H), 4.19 (dd,  $J$  = 12.4, 2.2 Hz, 1H), 3.96 (ddd,  $J$  = 10.2, 4.8, 2.2 Hz, 1H), 2.10, 2.02, 1.84 (3s, 9H); <sup>13</sup>C NMR (CDCl<sub>3</sub>)  $\delta$  170.5, 169.9, 169.4, 167.4, 167.0, 134.5, 131.4, 131.0, 123.7, 80.1, 76.1, 71.2, 68.6, 61.9, 53.2, 31.7, 20.7, 20.5, 20.3; MALDI-MS  $m/z$  566.0 [M + Na<sup>+</sup>], 581.9 [M + K<sup>+</sup>]. Anal. Calcd for C<sub>21</sub>H<sub>22</sub>BrNO<sub>9</sub>S·0.5H<sub>2</sub>O (553.38): C, 45.58; H, 4.19; N, 2.53. Found: C, 45.59; H, 3.75; N, 2.54.

### General Procedure for the Synthesis of Thioglycosides **24**, **26** and **30**.

To a solution of the appropriate GTM-Br (0.14 mmol) and Cys or HCy derivative (0.13 mmol) in EtOAc (2 mL) was added 2 mL of 10% Na<sub>2</sub>CO<sub>3</sub> followed by addition of TBAHS (170 mg, 0.5 mmol). The mixture was vigorously stirred at room temperature for 8 h, then diluted with EtOAc and washed successively with saturated aqueous NaHCO<sub>3</sub> and brine. The organic layer was dried over MgSO<sub>4</sub>, concentrated in vacuo to give a residue which was purified by flash column chromatography to afford the corresponding desired product.

**24:** TLC  $R_f$  = 0.28 (petroleum ether/EtOAc, 3:2);  $[\alpha]_D = -86.1^\circ$  (c 1.0 CHCl<sub>3</sub>); <sup>1</sup>H NMR (CDCl<sub>3</sub>)  $\delta$  7.30 (m, 5H), 5.31 (d,  $J$  = 7.9 Hz, 1H), 5.17 (t,  $J$  = 9.3 Hz, 1H), 5.13 (q-like, 2H), 5.02 (t,  $J$  = 9.4 Hz, 1H), 4.98 (t,  $J$  = 9.2 Hz, 1H), 4.70 (d,  $J$  = 10.2 Hz, 1H), 4.54 (m, 1H), 4.18 (dd,  $J$  = 12.4, 4.8 Hz, 1H), 4.05 (dd,  $J$  = 12.5, 2.2 Hz, 1H), 3.74 (AB peak,  $J$  = 13.6 Hz, 2H), 3.64 (ddd,  $J$  = 9.9, 4.7, 2.2 Hz, 1H), 3.13 (dd,  $J$  = 14.0, 4.4 Hz, 1H), 2.87 (dd,  $J$  = 14.1, 6.3 Hz, 1H), 2.00, 1.96, 1.945, 1.937 (4s, 12H), 1.37 (s, 9H); <sup>13</sup>C NMR (CDCl<sub>3</sub>)  $\delta$  170.6, 170.5, 170.0, 169.3, 155.0, 135.0, 128.62, 128.56, 128.4, 81.4, 80.3, 75.9, 73.8, 69.7, 68.2, 67.5, 61.9, 53.4, 33.5, 33.1, 28.2, 20.6, 20.5; MALDI-MS  $m/z$  710.7 [M + Na<sup>+</sup>], 726.7 [M + K<sup>+</sup>]. Anal. Calcd for C<sub>30</sub>H<sub>41</sub>NO<sub>13</sub>S<sub>2</sub>·H<sub>2</sub>O (705.79): C, 51.05; H, 6.14; N, 1.98. Found: C, 50.78; H, 5.55; N, 1.96.

**26:** TLC  $R_f$  = 0.28 (petroleum ether/EtOAc, 1:1);  $[\alpha]_D = -59.6^\circ$  (c 1.0 CHCl<sub>3</sub>); <sup>1</sup>H NMR (CDCl<sub>3</sub>)  $\delta$  7.78 (d,  $J$  = 7.4 Hz, 2H), 7.61 (d,  $J$  = 6.3 Hz, 2H), 7.41 (t,  $J$  = 7.4 Hz, 2H), 7.32 (t,  $J$  = 7.4 Hz, 2H), 5.92 (m, 1H), 5.68 (d,  $J$  = 7.9 Hz, 1H), 5.40-5.27 (m, 3H), 5.23 (t,  $J$  = 9.0 Hz, 1H), 5.11 (dd,  $J$  = 10.3, 7.8 Hz, 1H), 5.00 (t,  $J$  = 9.9 Hz, 1H), 4.95 (dd,  $J$  = 10.4, 3.3 Hz, 1H), 4.74 (d,  $J$  = 10.2 Hz, 1H), 4.67 (m, 3H), 4.50 (dd,  $J$  = 12.2, 1.3 Hz, 1H), 4.45 (d,  $J$  = 7.6 Hz,

1H), 4.42 (d,  $J = 6.4$  Hz, 2H), 4.25 (t,  $J = 6.8$  Hz, 1H), 4.10 (m, 3H), 3.88-3.73 (m, 4H), 3.62 (m, 1H), 3.21 (dd,  $J = 14.3, 4.3$  Hz, 1H), 2.98 (dd,  $J = 14.1, 6.6$  Hz, 1H), 2.15, 2.10, 2.05, 2.04, 2.03, 1.97 (6s, 21H);  $^{13}\text{C}$  NMR ( $\text{CDCl}_3$ )  $\delta$  170.2, 170.0, 169.9, 169.6, 169.0, 155.7, 143.7, 141.3, 131.2, 127.7, 127.1, 125.0, 120.0, 119.3, 101.0, 81.2, 76.9, 76.1, 73.7, 70.9, 70.7, 70.1, 69.1, 67.2, 66.6, 66.4, 62.0, 60.8, 53.5, 47.1, 33.4, 33.1, 20.75, 20.69, 20.5, 20.4; MALDI-MS  $m/z$  1070.9  $[\text{M} + \text{Na}^+]$ . Anal. Calcd for  $\text{C}_{48}\text{H}_{57}\text{NO}_{21}\text{S}_2$  (1048.10): C, 55.01; H, 5.48; N, 1.34. Found: C, 54.65; H, 5.60; N, 1.27.

**30**: TLC  $R_f = 0.47$  (petroleum ether/EtOAc, 1:1);  $[\alpha]_D = -78.8^\circ$  (c 1.0  $\text{CHCl}_3$ );  $^1\text{H}$  NMR ( $\text{CDCl}_3$ )  $\delta$  6.61 (d,  $J = 8.6$  Hz, 1H), 6.20 (d,  $J = 9.1$  Hz, 1H), 5.32 (d,  $J = 8.3$  Hz, 1H), 5.26 (t,  $J = 9.8$  Hz, 1H), 5.06 (t,  $J = 9.8$  Hz, 1H), 5.02 (overlapped, 1H), 4.70 (m, 2H), 4.55 (dd,  $J = 8.6, 4.7$  Hz, 1H), 4.27 (m, 1H), 4.24 (dd,  $J = 12.3, 4.8$  Hz, 1H), 4.10 (dd,  $J = 12.2, 1.9$  Hz, 1H), 3.92 (t,  $J = 10.3$  Hz, 1H), 3.90, 3.76 (AB peak,  $J = 14.1$  Hz, 2H), 3.83 (m, 1H), 3.71 (s, 3H), 2.70 (t-like,  $J = 5.9$  Hz, 2H), 2.05, 1.99, 1.98 (3s, 9H), 2.00 (overlapped, 3H), 1.41 (s, 9H), 1.40 (m, 1H), 1.20 (m, 1H), 0.89 (d,  $J = 6.8$  Hz, 3H), 0.88 (t,  $J = 7.2$  Hz, 3H);  $^{13}\text{C}$  NMR ( $\text{CDCl}_3$ )  $\delta$  172.1, 171.2, 170.6, 170.2, 169.3, 155.5, 154.2, 95.5, 82.4, 80.3, 75.7, 74.3, 73.4, 68.7, 62.1, 56.5, 54.6, 53.3, 52.1, 37.5, 33.6, 28.2, 27.5, 24.9, 20.6, 20.4, 15.4, 11.4; MALDI-MS  $m/z$  892.1  $[\text{M} + \text{Na}^+]$ , 908.1  $[\text{M} + \text{K}^+]$ . Anal. Calcd for  $\text{C}_{32}\text{H}_{50}\text{Cl}_3\text{N}_3\text{O}_{14}\text{S}_2$  (871.24): C, 44.12; H, 5.78; N, 4.82. Found: C, 44.31; H, 5.49; N, 4.80.

Compound **30** was further transformed into **31** according to our previous procedure.<sup>24</sup>

**31**: TLC  $R_f = 0.14$  (petroleum ether/EtOAc, 1:2);  $[\alpha]_D = -76.0^\circ$  (c 0.4  $\text{CHCl}_3$ );  $^1\text{H}$  NMR ( $\text{CDCl}_3$ )  $\delta$  6.84 (d,  $J = 8.2$  Hz, 1H), 6.27 (d,  $J = 7.6$  Hz, 1H), 5.51 (d,  $J = 7.9$  Hz, 1H), 5.21 (t,  $J = 9.7$  Hz, 1H), 5.06 (t,  $J = 9.4$  Hz, 1H), 4.89 (d,  $J = 10.6$  Hz, 1H), 4.53 (dd,  $J = 8.6, 4.9$  Hz, 1H), 4.22 (dd,  $J = 12.3, 4.8$  Hz, 1H), 4.20 (overlapped, 2H), 4.11 (dd,  $J = 12.3, 2.4$  Hz, 1H), 3.83 (AB peak,  $J = 13.6$  Hz, 2H), 3.75 (overlapped, 1H), 3.71 (s, 3H), 2.69 (m, 2H), 2.05, 2.00, 1.99, 1.94 (4s, 12H), 1.95 (overlapped, 3H), 1.42 (s, 9H), 1.41 (m, 1H), 1.20 (m, 1H), 0.89 (d,  $J = 6.9$  Hz, 3H), 0.88 (t,  $J = 7.3$  Hz, 3H);  $^{13}\text{C}$  NMR ( $\text{CDCl}_3$ )  $\delta$  172.1, 171.4, 170.8, 170.7, 170.5, 169.3, 155.7, 82.6, 80.4, 75.9, 73.7, 68.6, 62.2, 56.6, 53.6, 52.9, 52.1, 37.7, 33.0, 32.0, 28.3, 27.6, 25.0, 23.2, 20.7, 20.62, 20.56, 15.5, 11.5; MALDI-MS  $m/z$  760.7  $[\text{M} + \text{Na}^+]$ , 776.7  $[\text{M} + \text{K}^+]$ . HRMS (MALDI) calcd for  $\text{C}_{31}\text{H}_{51}\text{N}_3\text{O}_{13}\text{S}_2\text{Na}$  ( $\text{M} + \text{Na}^+$ ) 760.2763, found 760.2775. Anal. Calcd for  $\text{C}_{31}\text{H}_{51}\text{N}_3\text{O}_{13}\text{S}_2$  (737.88): C, 50.46; H, 6.97; N, 5.69. Found: C, 50.90; H, 7.34; N, 5.44.

**28:** To a solution of GTM-Br **16** (60 mg, 80  $\mu$ mol) and tripeptide **27** (29 mg, 77  $\mu$ mol) in 2 mL of DMF was added 0.45 mL of pH 8.5 solution of NaHCO<sub>3</sub> followed by addition of 0.85 mL of H<sub>2</sub>O. The resulting mixture was stirred at room temperature for 7 h, then diluted with EtOAc and washed successively with saturated aqueous NaHCO<sub>3</sub> and brine. The organic layer was dried over MgSO<sub>4</sub>, concentrated in vacuo to give a residue which was purified by flash column chromatography (petroleum ether/EtOAc, 1:1  $\rightarrow$  1:3) to afford the desired product **28** (58 mg, 73%) as a white amorphous solid: TLC  $R_f$  = 0.57 (EtOAc);  $[\alpha]_D$  = -59.4° (c 1.0 CHCl<sub>3</sub>); <sup>1</sup>H NMR (CDCl<sub>3</sub>)  $\delta$  7.11 (d,  $J$  = 7.3 Hz, 1H), 6.77 (d,  $J$  = 7.4 Hz, 1H), 5.36 (d,  $J$  = 8.2 Hz, 1H), 5.31 (d,  $J$  = 3.3 Hz, 1H), 5.24 (t,  $J$  = 9.0 Hz, 1H), 5.07 (dd,  $J$  = 10.3, 7.8 Hz, 1H), 4.98 (t,  $J$  = 9.8 Hz, 1H), 4.92 (dd,  $J$  = 10.6, 3.3 Hz, 1H), 4.72 (d,  $J$  = 10.1 Hz, 1H), 4.48 (m, 4H), 4.37 (m, 1H), 4.08 (m, 3H), 3.85 (t,  $J$  = 6.9 Hz, 1H), 3.78 (m, 3H), 3.70 (s, 3H), 3.66 (overlapped m, 1H), 3.00 (dd,  $J$  = 14.0, 6.0 Hz, 1H), 2.79 (dd,  $J$  = 14.2, 7.6 Hz, 1H), 2.11, 2.08, 2.04, 2.02, 2.00, 1.92 (6s, 21H), 1.40 (s, 9H), 1.37 (d,  $J$  = 7.0 Hz, 3H), 1.36 (d,  $J$  = 7.2 Hz, 3H); <sup>13</sup>C NMR (CDCl<sub>3</sub>)  $\delta$  173.0, 171.2, 170.4, 170.2, 170.04, 169.96, 169.6, 168.9, 155.4, 101.0, 81.3, 80.4, 76.8, 76.1, 73.6, 71.0, 70.7, 70.3, 69.1, 66.7, 61.9, 60.8, 53.4, 52.4, 48.9, 48.1, 34.1, 33.0, 28.2, 20.8, 20.7, 20.6, 20.5, 20.4, 18.1, 17.9; MALDI-MS  $m/z$  1064.1 [M + Na<sup>+</sup>], 1080.1 [M + K<sup>+</sup>]. Anal. Calcd for C<sub>42</sub>H<sub>63</sub>N<sub>3</sub>O<sub>23</sub>S<sub>2</sub> (1042.09): C, 48.41; H, 6.09; N, 4.03. Found: C, 48.38; H, 6.05; N, 4.34.

**33:** The reaction procedure was identical with that for **28** except GTM-Br **17** was used in place of **16** and peptide **32** was used instead of **27**. Column chromatography was performed with EtOAc/MeOH 30:1. The *S*-neoglycopeptide **33** was isolated as a white amorphous solid in 69% yield: TLC  $R_f$  = 0.49 (EtOAc/MeOH, 20:1);  $[\alpha]_D$  = -47.8° (c 0.6 CHCl<sub>3</sub>); <sup>1</sup>H NMR (CDCl<sub>3</sub>)  $\delta$  7.38 (d,  $J$  = 7.2 Hz, 1H), 7.26 (d,  $J$  = 6.7 Hz, 1H), 6.44 (br s, 1H), 5.85 (br s, 1H), 5.62 (d,  $J$  = 7.2 Hz, 1H), 5.26 (t,  $J$  = 9.2 Hz, 1H), 5.13 (t,  $J$  = 9.3 Hz, 1H), 5.03 (t,  $J$  = 9.6 Hz, 1H), 4.96 (t,  $J$  = 9.7 Hz, 1H), 4.90 (t,  $J$  = 9.0 Hz, 1H), 4.73 (d,  $J$  = 10.1 Hz, 1H), 4.52 (m, 2H), 4.49 (d,  $J$  = 8.0 Hz, 1H), 4.42-4.34 (m, 2H), 4.29 (m, 1H), 4.11 (m, 2H), 4.02 (dd,  $J$  = 12.4, 1.9 Hz, 1H), 3.78 (m, 3H), 3.65 (m, 3H), 2.70 (m, 1H), 2.59 (m, 1H), 2.12, 2.06, 2.03, 2.00, 1.98, 1.96 (6s, 21H), 2.10 (overlapped m, 2H), 1.43 (s, 9H), 1.39 (d,  $J$  = 7.4 Hz, 3H), 1.19 (d,  $J$  = 6.3 Hz, 3H); <sup>13</sup>C NMR (CDCl<sub>3</sub>)  $\delta$  174.6, 171.6, 170.7, 170.5, 170.1, 170.0, 169.9, 169.4, 169.3, 156.3, 100.7, 81.4, 80.6, 76.3, 73.4, 72.9, 72.0, 71.6, 70.1, 67.9, 67.2, 61.9, 61.6, 59.1, 52.9, 48.9, 33.0, 31.2, 29.7, 28.3, 27.8, 21.0, 20.7, 20.6, 20.5, 18.9, 17.9; MALDI-MS  $m/z$  1093.4 [M + Na<sup>+</sup>], 1109.4 [M + K<sup>+</sup>]. Anal. Calcd for C<sub>43</sub>H<sub>66</sub>N<sub>4</sub>O<sub>23</sub>S<sub>2</sub> (1071.13): C, 48.22; H, 6.21; N, 5.23. Found: C, 48.40; H, 6.52; N, 5.07.
